# Supplementary material for: Controlled usage of H/D exchange to circumvent concomitant polymorphs of ROY
Source: IUCrJ. 2018 Jul 27;5(Pt 5):569–73. doi: 10.1107/S2052252518009995 (PMC6126644; doi:10.1107/S2052252518009995)

# IUCrJ

**Volume 5 (2018)**

**Supporting information for article:**

**Controlled usage of H/D-exchange to circumvent concomitant polymorphs of ROY**

**Jacqueline Falk, Detlef Hofmann and Klaus Merz**

## S1. Synthesis of d<sub>1</sub>-ROY

d<sub>1</sub>-ROY was synthesized *via* a deuterated solvent reflux reaction. A saturated solution at RT of ROY in d<sub>4</sub>-methanol, d<sub>6</sub>-ethanol or d<sub>8</sub>-1-propanol was stirred and heated under reflux for 30 minutes. The solution was slowly cooled down to -7 °C. The product was obtained as a yellow crystalline product. IR ( $\nu$  [cm<sup>-1</sup>]): 2442, 2230, 1613, 1568, 1552, 1364, 1228, 1263, 930, 839.

## S2. Temperature Screening

ROY and d<sub>1</sub>-ROY were dissolved until saturation in d<sub>6</sub>-methanol at temperatures between RT and 60 °C and subsequently the solution was slowly cooled down to -7 °C. For comparative reasons, a temperature screening of ROY was carried out similarly. To reproduce the results of the crystallization investigations, the experiments were repeated. The obtained crystalline materials were characterized by powder X-Ray diffraction (PXRD), measured on a Bruker AXS Advance diffractometer in flat mode and Bragg-Brentano geometry using filtered CuK $\alpha$  radiation.

**Table S1. Crystallographic data of the Y polymorph of d<sub>1</sub>-ROY and ROY.**

|                                                    | d <sub>1</sub> -ROY Y polymorph                                                            | ROY Y polymorph<br>(Yu <i>et al.</i> , 2000)                                |
|----------------------------------------------------|--------------------------------------------------------------------------------------------|-----------------------------------------------------------------------------|
| identification code                                | CCDC 1828199                                                                               | CCDC 1241884                                                                |
| empirical formula                                  | C <sub>12</sub> H <sub>8</sub> D <sub>1</sub> N <sub>3</sub> O <sub>2</sub> S <sub>1</sub> | C <sub>12</sub> H <sub>9</sub> N <sub>3</sub> O <sub>2</sub> S <sub>1</sub> |
| formula weight                                     | 260.28                                                                                     | 259.28                                                                      |
| Temperature                                        | 170                                                                                        | 273                                                                         |
| crystalline system                                 | monoclinic                                                                                 | monoclinic                                                                  |
| space group                                        | <i>P</i> 2 <sub>1</sub> / <i>n</i>                                                         | <i>P</i> 2 <sub>1</sub> / <i>n</i>                                          |
| description                                        | yellow prism                                                                               | yellow prism                                                                |
| <i>a</i> [Å]                                       | 8.537(5)                                                                                   | 8.5001(1)                                                                   |
| <i>b</i> [Å]                                       | 16.466(5)                                                                                  | 16.413(2)                                                                   |
| <i>c</i> [Å]                                       | 8.569(5)                                                                                   | 8.5371(1)                                                                   |
| $\beta$ [°]                                        | 91.905(5)                                                                                  | 91.767(7)                                                                   |
| <i>V</i> [Å <sup>3</sup> ]                         | 1203.9(11)                                                                                 | 1190.5(4)                                                                   |
| <i>Z</i>                                           | 4                                                                                          | 4                                                                           |
| <i>D</i> <sub>calcd</sub> , [g/cm <sup>3</sup> ]   | 1.407                                                                                      | 1.447                                                                       |
| <i>F</i> (000)                                     | 536                                                                                        | 536                                                                         |
| 2 $\theta$ <sub>max</sub>                          | 50                                                                                         | 48                                                                          |
| reflections measured                               | 14600                                                                                      | 2095                                                                        |
| Unique reflections                                 | 2837                                                                                       | 1956                                                                        |
| parameters                                         | 199                                                                                        | 167                                                                         |
| <i>R</i> 1 with <i>I</i> > 2 $\sigma$ ( <i>I</i> ) | 0.0400                                                                                     | 0.033                                                                       |
| <i>wR</i> 2 for all reflections                    | 0.0829                                                                                     | 0.044                                                                       |
| GOF                                                | 0.761                                                                                      | 1.415                                                                       |

**Figure S1.** Temperature crystallization screening of ROY from methanol at different temperatures and fast cooling down to  $-7^{\circ}\text{C}$

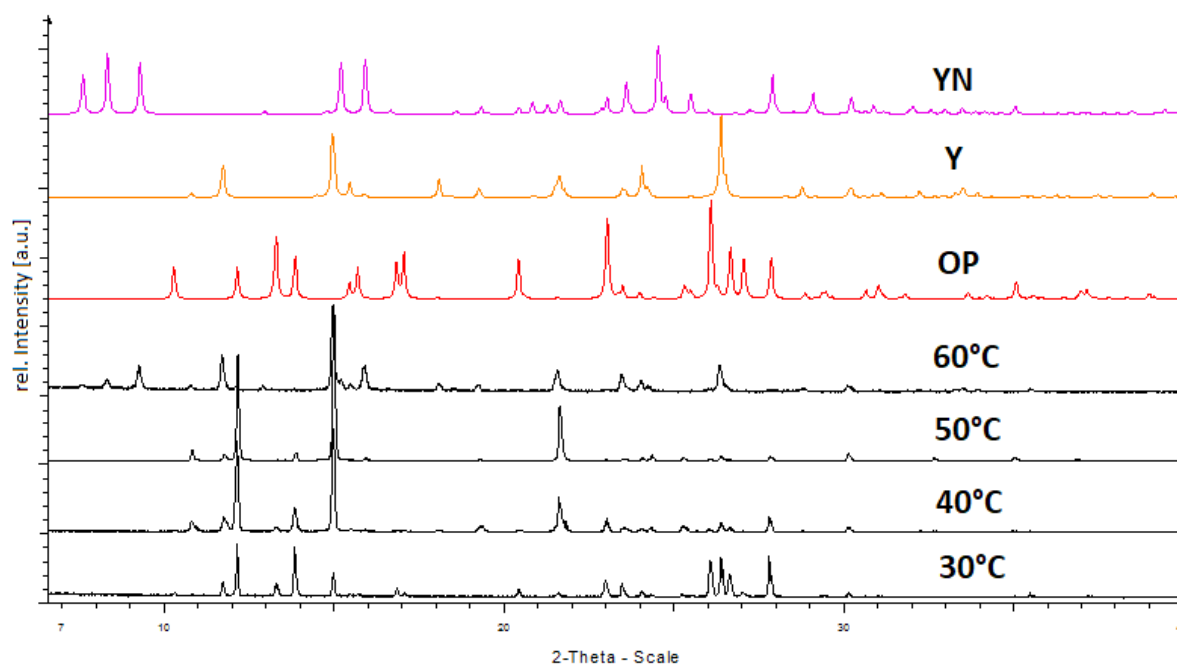

Supplement: Supplementary file 1 [file m-05-00569-sup1.pdf]
